# Supplementary material
Source: PubMed Central journal article supplement (PMC2706016)
Supplement: NIHMS16166-supplement-01.pdf [file NIHMS16166-supplement-01.pdf]

## Supplementary Material

### Solution structure of the COMMD1 N-terminal domain

Monika Sommerhalter, Yongbo Zhang, and Amy C. Rosenzweig

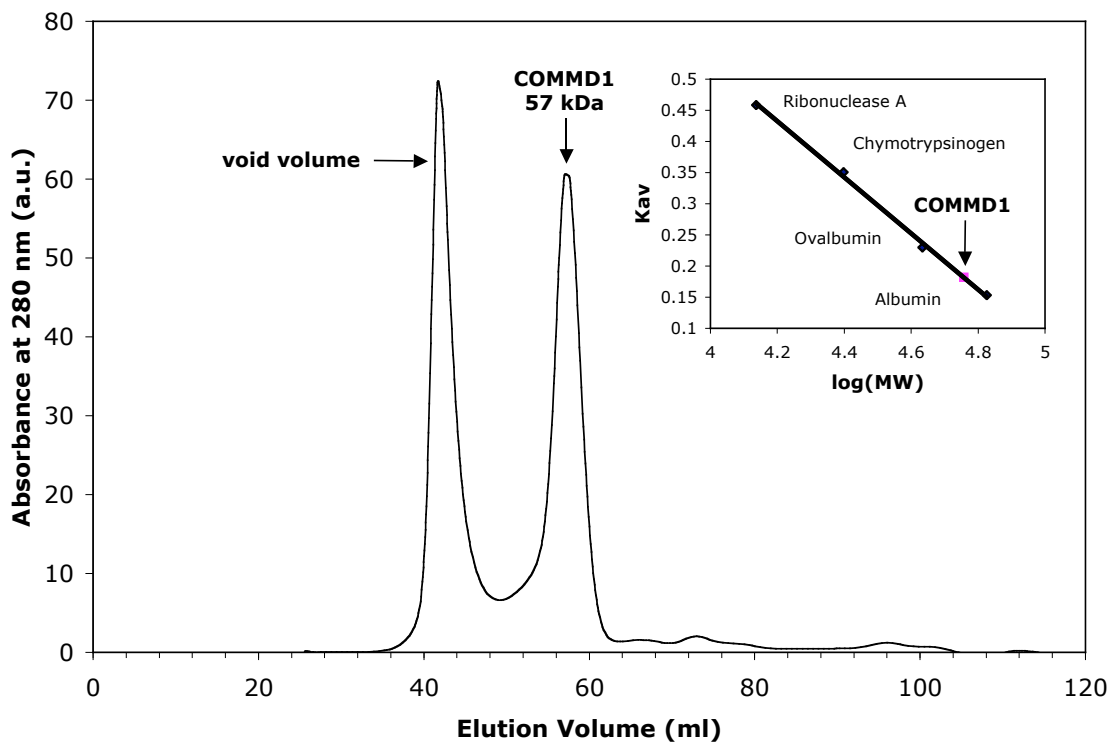

Figure S1. Size exclusion chromatography of full-length COMMD1 on a HiLoad 16/60 Superdex 75 column (Amersham Biosciences) equilibrated with 100 mM imidazole (pH 8.0), 100 mM NaCl, 0.2 mM tris-(2-carboxyethyl)-phosphine. Inset: Column calibration using the low molecular weight calibration kit from Amersham Biosciences with ribonuclease A (13.7 kDa), chymotrypsinogen (25 kDa), ovalbumin (43 kDa), and albumin (67 kDa).

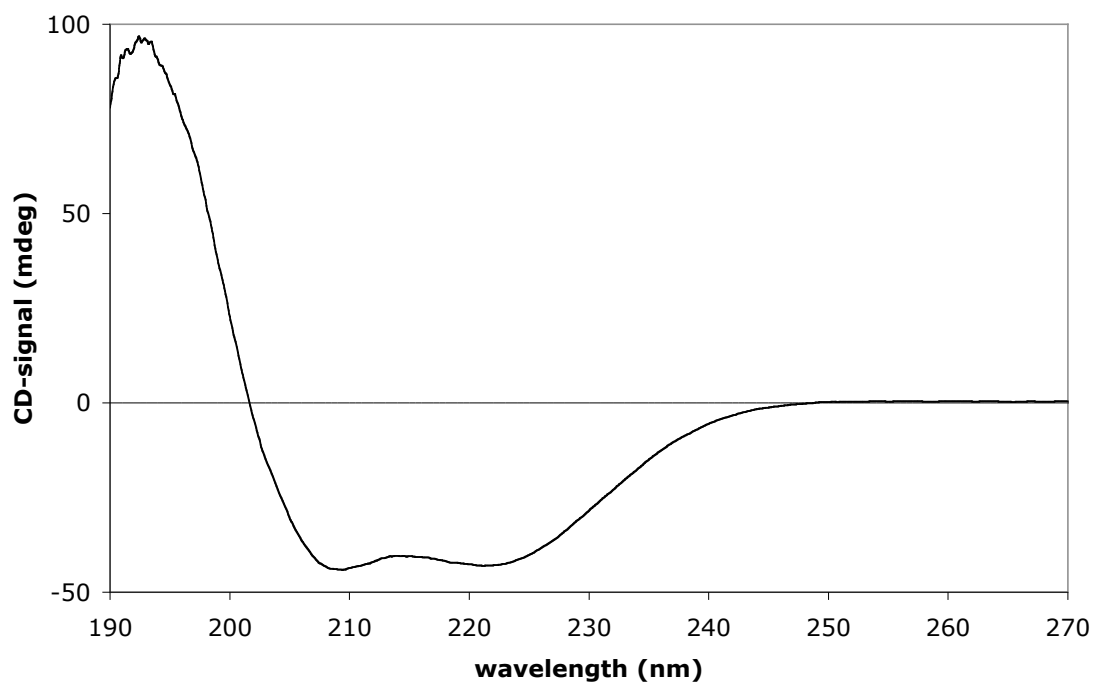

Figure S2. The CD spectrum of a 5.5  $\mu$ M N-COMMD1 solution in 5 mM sodium phosphate (pH 6). The positions of the double minimum are at 208 nm and 222 nm.

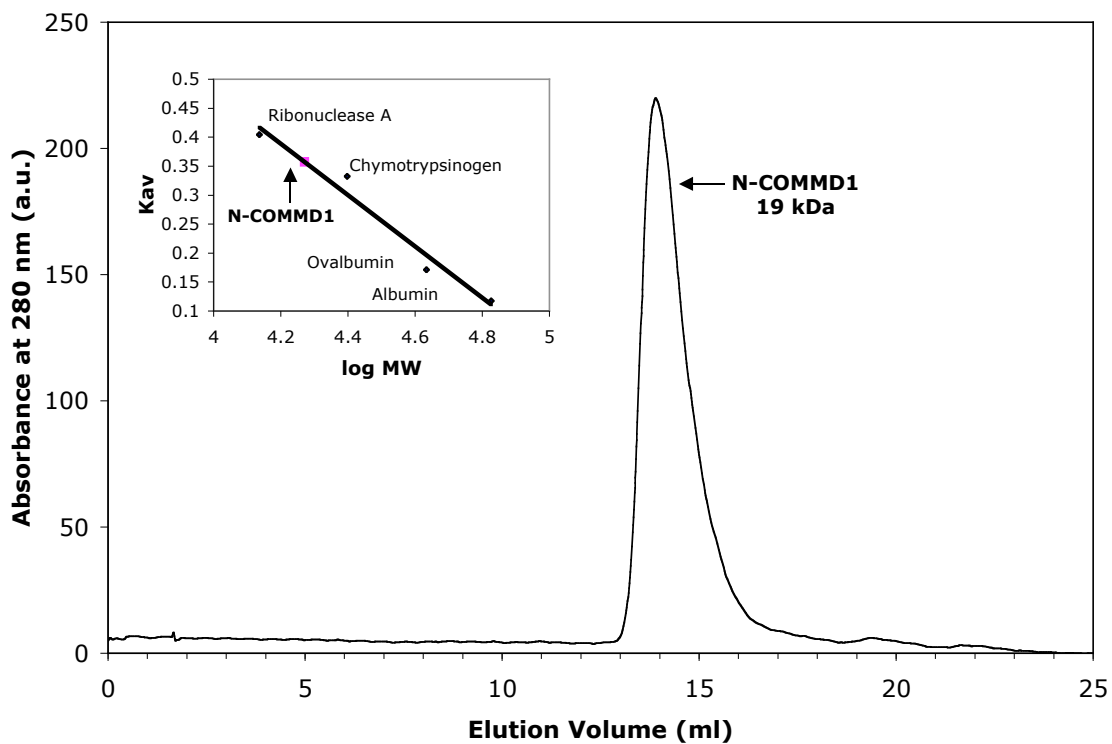

Figure S3. Size exclusion chromatography of N-COMMD1 on a Superdex 75 10/300 GL column (Amersham Biosciences) equilibrated with 25 mM sodium phosphate (pH 6.1), 50 mM NaCl, 0.2% sodium azide. Inset: Column calibration using the low molecular weight calibration kit from Amersham Biosciences with ribonuclease A (13.7 kDa), chymotrypsinogen (25 kDa), ovalbumin (43 kDa), and albumin (67 kDa).
